# CORRECTION

## Correction: Organisational kindness and compassion: what are the barriers, enablers and outcomes for clients and stakeholders?

### The *PLOS One* Staff

In the Introduction, there is an error in the first sentence of the first paragraph. The correct sentence is: Unkindness is defined as “not treating someone well, or not considering someone’s feelings” [1].

The publisher apologizes for the error.

### Reference

1. Smith-Merry J, Mellifont D, Scanlan JN, Hancock N. Organisational kindness and compassion: what are the barriers, enablers and outcomes for clients and stakeholders?. *PLoS One*. 2025;20(6):e0312450. <https://doi.org/10.1371/journal.pone.0312450> PMID: [40560881](https://pubmed.ncbi.nlm.nih.gov/40560881/)

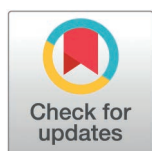

### OPEN ACCESS

**Citation:** The *PLOS One* Staff (2025) Correction: Organisational kindness and compassion: what are the barriers, enablers and outcomes for clients and stakeholders? *PLoS One* 20(11): e0337341. <https://doi.org/10.1371/journal.pone.0337341>

**Published:** November 19, 2025

**Copyright:** © 2025 The *PLOS One* Staff. This is an open access article distributed under the terms of the [Creative Commons Attribution License](https://creativecommons.org/licenses/by/4.0/), which permits unrestricted use, distribution, and reproduction in any medium, provided the original author and source are credited.
